# Supplementary material for: Adolescents’ Self-Perception of Morality, Competence, and Sociability and their Interplay with Quality of Family, Friend, and School Relationships: A Three-Wave Longitudinal Study
Source: Springer Nature journal article supplement (doi:10.1007/s10964-018-0864-z), 2018-06-15
Supplement: MOESM1 [file 10964_2018_864_MOESM1_ESM.docx]

**Study Measures**

Measures were administered in participants’ native language (i.e., Lithuanian). English translations are added between brackets for sake of clarity.

**Measures of morality, competence, and sociability**

(from the Self-Perception Profile for Adolescence, SPPA; Harter, 1988)

| Kiek tave apibūdina šie teiginiai?  *How well each of these statements does describe you?* | Atsakymų variantai | | Response options |
| --- | --- | --- | --- |
| 1 | Labai netinka | *Not true for me at all* |
| 2 | Iš dalies netinka | *Partly not true for me* |
| 3 | Iš dalies man tinka | *Sort of true for me* |
| 4 | Labai man tinka | *Very true for me* |

Morality

1. Paprastai elgiuosi teisingai [I usually do the right thing]
2. Dėl savo elgesio dažnai patenku į bėdą [I often get in trouble for the things I do]*
3. Esu išties patenkintas/-a tuo, kaip aš elgiuosi [I feel really good about the way I act]
4. Darau tai, ko neturėčiau daryti [I do things I know I shouldn’t do]*
5. Dažniausiai elgiuosi taip, kaip turėčiau [I usually act the way I know I am supposed to]

Competence

1. Jaučiuosi toks pat sumanus, kaip ir mano bendraamžiai [I feel that I am just as smart as others my age]
2. Man užima daug laiko atlikti mokykloje gautas užduotis [I am pretty slow in finishing my school work]*
3. Man labai gerai sekasi atlikti užduotis klasėje [I do very well at my class work]
4. Man sunkiai sekasi spręsti užduotis mokykloje [I have trouble figuring out the answers in school]*
5. Manau, kad esu gana protingas [I feel that I am pretty intelligent]

Sociability

1. Man sunku susirasti draugų [I find it hard to make friends]*
2. Turiu daug draugų [I have a lot of friends]
3. Aš nesu mėgiamas žmogus [I am very hard to like]*
4. Aš populiarus/-i tarp savo bendraamžių [I am popular with others my age]
5. Jaučiu, kad bendraamžiai mane priima [I feel that I am socially accepted]

*Reverse coded item

**Measures of family and school relationships**

(From the Profiles of Student Life-Attitudes and Behaviors Survey, PSL-AB; Benson et al., 1998)

| Įvertink, kiek sutinki su šiais teiginiais ?  *How much do you agree or disagree with the following statements?* | Atsakymų variantai | | *Response options* |
| --- | --- | --- | --- |
| 1 | Visiškai nesutinku | *Strongly disagree* |
| 2 | Nesutinku | *Disagree* |
| 3 | Nesu tikras | *Not sure* |
| 4 | Sutinku | *Agree* |
| 5 | Visiškai sutinku | *Strongly agree* |

Family relationships

1. Gerai sutariu su savo tėvais [I get along with my parents]
2. Prireikus tėvai man padeda ir paremia [My parents give me help and support when I need it]
3. Mano tėvai dažnai sako, jog mane myli [My parents often tell me they love me]
4. Daug kalbuosi su savo tėvais [I have lots of good conversations with my parents]
5. Šeimoje jaučiuosi naudingas/-a ir svarbus/-i [In my family, I feel useful and important]

School relationships

1. Man rūpi mokykla, kurią lankau [I care about the school I go to]
2. Aš iš tikrųjų rūpiu savo mokytojams [My teachers really care about me]
3. Mokykloje mane dažnai paskatina [I get a lot of encouragement in my school]
4. Aš rūpiu kitiems mano mokyklos moksleiviams [Students in my school care about me]
5. Mano mokykloje galioja aiškios taisyklės, ką mokiniai gali daryti ir ko ne [In my school, there are clear cut rules for what students can or cannot do]
6. Mokykloje mokytojai ragina mane siekti geriausių rezultatų, kokius galiu pasiekti [Teachers at school push me to be the best I can be]

**Measure of peer relationships**

(From the of the Inventory of Parent and Peer Attachment, IPPA; Armsden & Greenberg, 1987; Nada-Raja, McGee, & Stanton, 1992)

| Įvertink, kiek sutinki su šiais teiginiais ?  *How much do you agree or disagree with the following statements?* | Atsakymų variantai | | *Response options* |
| --- | --- | --- | --- |
| 1 | Visiškai nesutinku | *Strongly disagree* |
| 2 | Nesutinku | *Disagree* |
| 3 | Nesu tikras | *Not sure* |
| 4 | Sutinku | *Agree* |
| 5 | Visiškai sutinku | *Strongly agree* |

Peer relationships

1. Pasitikiu savo draugais [I trust my friends]
2. Jaučiu, jog mano draugai yra geri draugai [I feel my friends are good friends]
3. Aš rūpiu savo draugams [My friends care about me]
4. Prireikus mano draugai būna šalia [My friends are there when I need them]
